# Supplementary material for: Genome-wide transcription start site profiling in biofilm-grown Burkholderia cenocepacia J2315
Source: PubMed Central journal article supplement (PMC4603805; doi:10.1186/s12864-015-1993-3), 2015-10-13

# Figure S1A

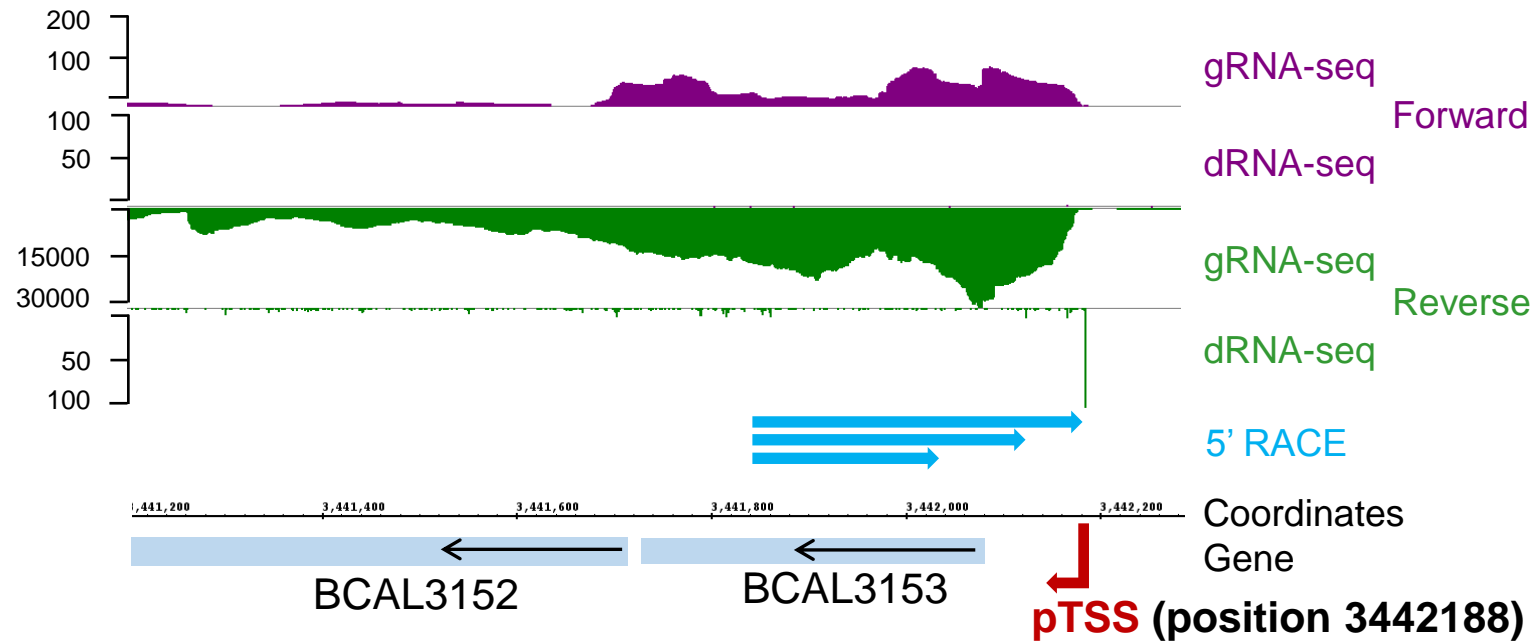

# Figure S1B

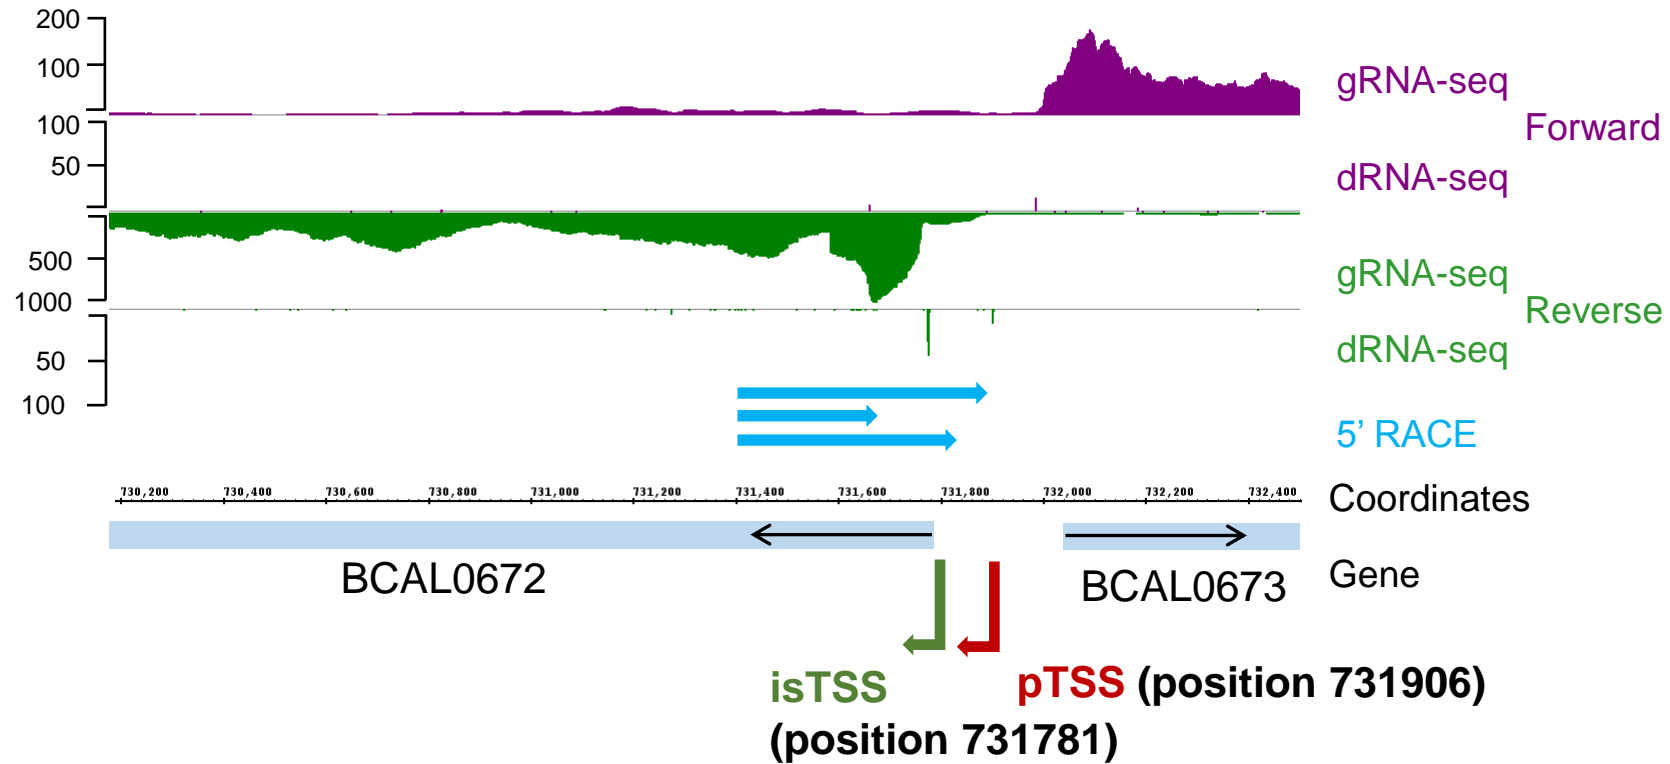

# Figure S1C

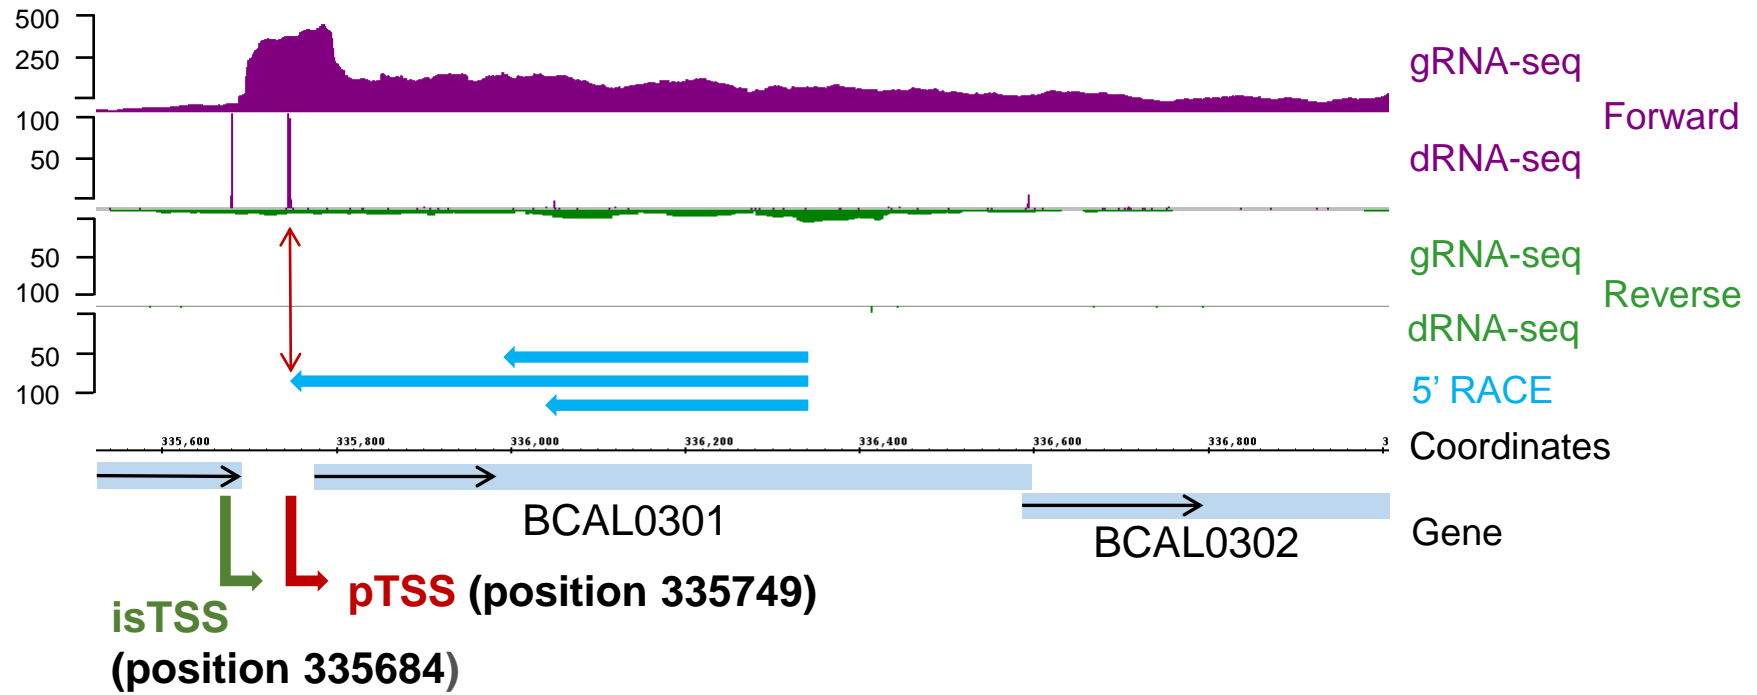

# Figure S1D

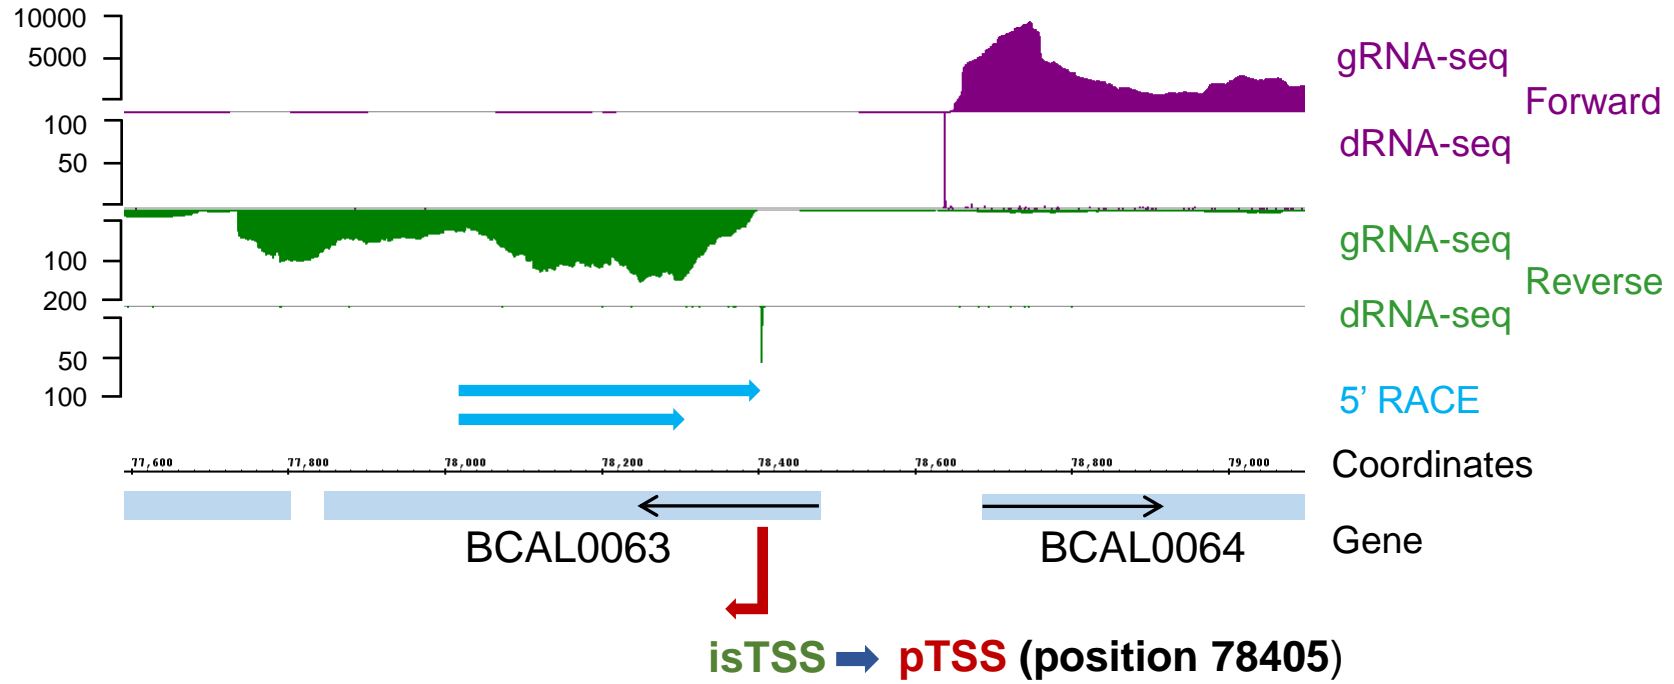

# Figure S1E

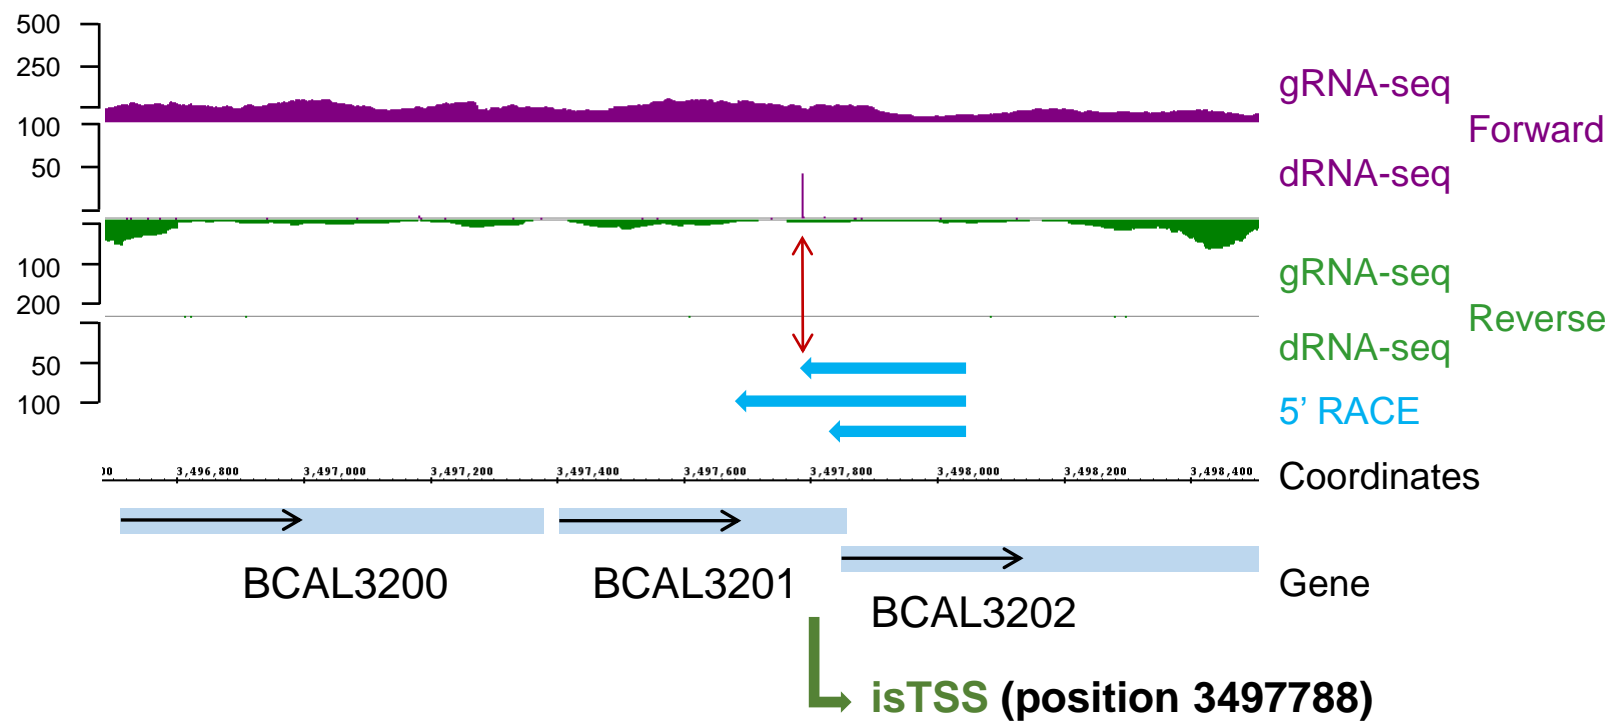

# Figure S1F

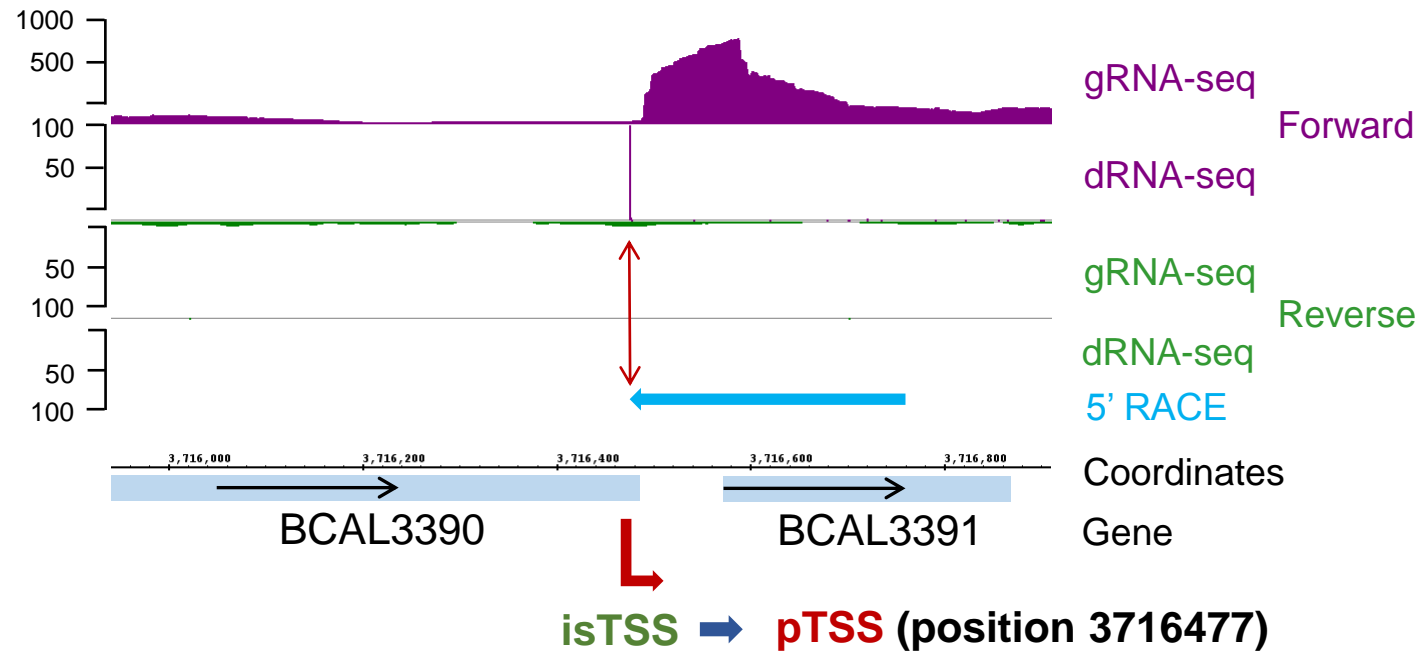

Supplement: 12864_2015_1993_MOESM4_ESM.pdf [file 12864_2015_1993_MOESM4_ESM.pdf]
