# Supplementary material for: Genome-wide transcription start site profiling in biofilm-grown Burkholderia cenocepacia J2315
Source: BMC Genomics. 2015 Oct 13;16:775. doi: 10.1186/s12864-015-1993-3 (PMC4603805; doi:10.1186/s12864-015-1993-3)
Supplement: Additional file 9: Table S8. — Amino acid sequences associated with orphan TSS or internal antisense TSS and with homologues in the non-redundant protein sequence database. (XLSX 18 kb) [file 12864_2015_1993_MOESM9_ESM.xlsx]

## Sheet: Sheet2
	Sass et al. 2015			Genome-wide transcription start site profiling in biofilm-grown Burkholderia cenocepacia J2315
Table S08: Amino acid sequences associated with orphan TSS and with homologues in the non-redundant protein sequence database
		oTSS position	Length (nt)		Genome position			Annotation	Genome feature at location			Amino acid sequence
		Replicon 1
		20581	807	+	20588..21394			hypothetical protein	intergenic region			MHRETNLQVENEETIEAQSARTPKRCWTESNSAFSFACTDSFDGASARVTATSRVCVRTASFPRFARPPFSVSGDSFANAAQSCTGASGLPGWRARNASVTLGFRRPCGRENGRQFSYKHNAEEGVRLDEQRSTVDRGRRGGTRRPFVMGCAVGHRGVPEPFRGPYARSRALAGRCARIDIRVCVRIRMSGRFFDVSPVAGLAAAGRFELRADHRCSRNDHSRARAFLRFLHPDDTPATHRDGRTIVWAGMRRAPGVSRENEHWRGRTR
		20899	231	+	20922..21152			hypothetical protein	intergenic gegion			MVGSSPTSTMQKREYGWMSSAARWIGAGEAARAVRSSWGARWVIAAFPSRSAARMRVPAPSRVVALASTSAFASVFA
		34663	729	-	complement (33747..34475)			hypothetical protein	opposite strand of BCAL0030			MTNEAEERCVATEAPHAAEQGDQQEQQLTRVHVAEQPHTERDGLREIFDNVEREVRDPQQRVRAERCRQQLVHEAARALDLDAVVDHQDEHAERDAERAVQVGRRNDAMVGNHVRQTEQADHAARQVDREEVEGVHQRNPHEHREGERRDEGAIAVDDGLRLVLDHFDEHLDRALETARHARRRLAGGQTQQDDRHDAAYDRPEQRVEIPDVNVENRRLMRGGEILQVVRNVLGRIRTARAFA
		246176	156	-	complement (245891..246046)			hypothetical protein	intergenic gegion			MNRVSQLVNNFLNDFVATAGLNFRTAEARYLRTPTALLPFLPRRVSVSAKEA
		292949	876	+	293054..293929			cytochrome c	opposite strand of BCAL0265			MSRPNPQVPSGARSRSQPRVARSLCYRLAFFVGDGRPQPALDQFMGLVEPRTLQRREQLDRQLALHALVAIRVEPLLRVAQRIDAFLARQFVALRQQRVDRLAGRREPLDHASIEIGQRTARIHHQDQAAKLRARRE regionRQQHFPVRLRGTGHFRVAVAGQVDEVRDGLSGRADGEVVDMLRAAGRLGRKGQPFLVAQHVDRRRLAGIRAARERDFRLDRRRQVAQMVDGRVEAGLMEQKGHGNRKDGRREPLGGGGVAPIGAGAFSTILYNTAVLPKANGRLPRAFMWLLR
		391331	210	-	complement (391088..391297)			hypothetical protein	intergenic gegion			MTANLRDGDTLSFRPADWPGQPRRSSVQRDCAPAPGVLPRVVRAKSIQYNTRPAILNRQVNRHPEIQRGQ
		548569	222	+	548605..548826			hypothetical protein	intergenic gegion			MTDSAADARSAPRRARCPRCGRGFDCGAHTQPFDCWCASMPVPPGGTPPAAGARCRCPECLADEIAQRMAGAAG
		570726	504	-	complement (570160..570663)			hypothetical protein	intergenic gegion			MQRQILQAACRPDDPEVARAARISFQTAACATTYGVMRAVGGNRTARAIADRLDGVSTSLHDERRRVVAYPSRGPAAVHRQACAQRQRAPARHRIGSCAPAVRRTFRTGTPSRGYDACRIPQPAFEHPSHPAPCRATRITRSASPRSPSVRVRRDGRPISQAQLEETT
		657026	189	-	complement (656763..656951)			hypothetical protein	intergenic gegion			MMQDRRLDYFKRPVRRNDQVFNTFNKPVECNRESPWPSGEVGSRRCAKFAQRRSRFRRQLRLA
		856054	165	-	complement (855807..855971)			hypothetical protein	intergenic gegion			MSACHGACRRRARARPTVRRRLRPSRRCSERREPPMIPRTPPRRADRHACPPPVP
		1179516	150	+	1179558..1179707			hypothetical protein	intergenic gegion			MRFYGFTLGLLGKRSNERCRKVHEPVQIPLDLSGGNGKNVSRFRNIVSRV
		1522383	153	+	1522524..1522676			hypothetical protein	intergenic gegion			MPDWRRAARPAAGLTHRGGSATMRAVPARPAKAVSPPGASRREMHPTVPHE
		1816729	198	-	complement (1816411..1816608)			hypothetical protein	intergenic gegion			MTRRAHRYKFFSQSLTDIPVRRAREHDVHAARSCVSVDRRRALHATTHDRSSALSHFVRCGNDDAR
		1816729	357	-	complement (1816176..1816532)			hypothetical protein	intergenic gegion, overlaps BCAL1662			MTCTQRVPASPSTGDAHCTRRRTIDRPRCHISSVAETTTPADRGRRSSPNGDRYTARADQNVSQSSPPAVAAAGAGAADAATGWRAGIAAGARFGAASRSTRAAAGAGAATGAAAARGA
		1823871	252	-	complement (1823624..1823875)			hypothetical protein	intergenic gegion			MEAAADRAAARFEEHRDGVCRREAANVSARAANPNQQMVLCSAGFVMKQTGCGHALPPRKKRRPLHAAGANPSQGGVTRTTQSD
		1878245	243	+	1878263..1878505			antitoxin, addiction module antidote protein, CC2985 family	opposite strand of BCAL1704			MSRNTSVSLGDHFAEFVDAQVRSGRYGSASDVVRAGLRLLESHETQMRALQEALKAGEGSGTPKPFDSEAFLARMRATHGG
		1878245	297	+	1878498..1878794			toxin-antitoxin system, toxin component, RelE family	opposite strand of BCAL1704			MAVKGRQLRLTPLAECDLEDIWRYTAEHWSPEQAEHYYRDLIGTMEALARGKKAGRICVVRDGYFRYPAGSHVVFYRETDETIDVIRVLHQRMDIERHL
		2136329	183	+	2136330..2136512			hypothetical protein	intergenic gegion			MNASSPHISRSCAGARCNASRHLTRITTASAEPHVPVDGAAAFFMERAPALPGPALTASRS
		2736707	255	-	complement (2736446..2736700)			conserved hypothetical protein	intergenic gegion			MFLRRPRAAPHMRHPAMRRSKRLSHRPPDAAASHPEDRSRPQTDAPSAPPAGAPDETPSDGDHNQGGARPEGLDYQRDLGQEQDA
		2935785	171	+	2935853..2936023			hypothetical protein	intergenic gegion with 6S RNA			MCTVAEICSTGARVTLSDVPEVLLTATNSEPQVQDAGLAAKAGAYPTASGTSDAVSF
		3008232	213	+	3008284..3008496			signal peptide protein	intergenic gegion			MNKLIAALVAGLFATAAFAQASAPEAAPAAAEAASAPAKHAAKKHHAAKKHHKASKKAAASDAAAPAAASN
		3533713	219	-	complement (3533480..3533698)			hypothetical protein	intergenic gegion			MEKMHKFDARMVKGEGGLVVVGDPGVETDVQRRGLFLVKLRKFDKSIDHATVAYSEKTERNPSEKANDASSED
		3821506	786	+	3821641..3822426			hypothetical protein	opposite strand of BCAL3484			MQPGMRAFNDPAIFSKAAAMFGAALGDNRLDTAIAQRASMPLRVVTAIGVDHARSLQWVAAQPTNWRNRIDQRQQLRDIVNVRAGQDRRERRAIGVGDDVVLRTWSRAIGGVWPSFWPAPTARIDEESTAAREKSIWSAARSFASSNSCRRSHTPAACQSRSRRQQVTPEPQPISAGRSRQRSPVLRTNRMPVSAARFETGRRPGFFSRRGLGGGNNGSINVHSSSSMLAISSVSVVPMPEVNSSPRKLTAPPGLFETVS
		Replicon 2
		514450	810	+	514570..515379			conserved hypothetical protein	opposite strand of BCAM0460			MAAGHRVAGFEPAGARRHVGSRAHQVSMRLRNCRTRGCVLAVKNASGVVSCTTTPFSMNTTRSATSCAKRTSCVTTSIVIPLPASSRMTASTSSRNAGSSAEVGSSNRMTSGSIARPRAMATRCFWPPDSRAGYSPALCARPTRSSRCSPRSSASLLRTPLTLTSPSMTFSSAVRCGNRLNDWNTIAVRWRMALMRFCSSRDSAVPPARSISMPHTDTLPASGSSRKFSERNNVVLPEPDGPISTTTSPRATRKSTRRSTTFSPKDLASP
		1204020	234	-	complement (1203562..1203795)			hypothetical protein	intergenic gegion			MAFRSGPIEFVCFCCYDRLRRARPDRGCAAPHKGPDAVRNRQSAFAGPFSIGCSAYRFAIASWREYGSRFRSFTGEFA
		1663047	120	+	1663105..1663344			hypothetical protein	intergenic gegion			MDPVAARHAHSRVARAARVYSVKGSIRFSGLFREIRIIRGNSNRIDAVSVSFLIRKSTAAIISFSAATLGMNGRALSSTQ
		1714596	195	-	complement (1714365..1714559)			hypothetical protein	opposite strand of BCAM1543B			MNAAACRHGAQADLLALTDGLSIARSAQTLRCCIRTVRNDVAGRSPIPRHCPEVLRLLALEAHSP
		1722817	168	+	1722880..1723047			lipoprotein	intergenic gegion			MKSATLAAALVAALVLVLSTGCTSSGSGVSQGPGMSRYGGSGGSGGGGGGGGGGGY
		1953292	369	+	1953414..1953782			hypothetical protein	intergenic gegion			MRRPSGLTTGQISRRIFRCCRMHAARRRARAFVLRAAPAACALRSRAVRPRASLRAPPIARADYPQPTGVQMNSDDSSRLPLAGATLRIDTPSASCAPASVPAFTDPQPIAPDATRRGALVRR
		1953292	177	+	1953467..1953643			hypothetical protein	intergenic gegion			MLSNARGAPSRACVRVARGASRVRSPFACRPAARLVARAADRPCRLSATDRSADELRRQ
		2050418	183	-	complement (2050218..2050400)			hypothetical protein	intergenic gegion			MRGRCIGSGKHANVEYRCRNSEETKMLNVSSVLISLAPMWAILLLASSAAAYFVFWRKVID
		2344673	2019	-	complement (2342565..2344583)			hypothetical protein	opposite strand of BCAM2107			MRADRAGSPGSPLASMYHRFLSGEIESIEIHHLDPGRHEVTNELRLAVCTRIDFGQCPQHGIRTKHQIHARTGPLQLTGPTVTSFIGVFAGNRLPFGRHVEQVAEEIDGQRFGLVGKNAVFFVAGLDVQHAQSADERRHLWGGQRQQLRLVDQQRFGRHREFALDEITETVCDRFEHREGVRVGLFLRGVHPAGRERHNHVVASALRRLLDAGAAGQYDQIGQRNLLAARLRAVELALNALENFQNLGQSCGLVDGPVLLRREADTRAVGAAALVRAAECRCRRPCGGHELGHGKPRGKDRLLERGNVRVVDEHMIDRRNRILPDQLFGRHVRPEVSGARSHVAVRELEPRARERVGEHVGVVHEMTRDLLVDGVEAQREGQHGGQQLFRRIVCMRDRR…
		2522103	651	+	2522227..2522877			conserved hypothetical protein	intergenic gegion			MHITCFGSPMNCPVRLSSAAAIACALSVSAAHVSGRDTLTDRSAGANVFRSERRAAARDDGRAVRMSRPRVQFAAPAERSPFDTPDTRPLRVTSDALVAPLPASSGREPDFVLPPNRVALGAGGNDSLGRAVPGYEQREQNWHEYLRANGSRPAGRGGSYAPQRPYDAPRGPHGAPNPFDPSVPQPETRTFYDNGSGTKCTATGGARTSRSSCDIAW
		2718612	180	-	complement (2392278..2392457)			hypothetical protein	intergenic gegion			MARAVEMQIQYQTKNRRVDNTRGARAIKHVCPSDWRVVLGHFPARRANGCSGRLDSSLIP
		Replicon 2
		115361	222	+	115575..115796			hypothetical protein	intergenic gegion			MKHFRPSHIRTNRGKVPVGPTEGAGRGCYSGYASGEDETIPDRALTLAVATPLDTSFRILPNRRTANVPTTKVR
		711503	990	+	711676..712665			hypothetical protein	opposite strand of BCAL0650			MGMLLVVMLERDGQVACSSRCVRFRHEGDVVAFHRFHEALGHPVTLRAAYRRGQWLQADGHCEPARVVGRVARTVVAQPLDFGRGMQFVAKPIFHCSQHHVAHDVAAVACRRGRPAHRLTVTAIQRERYAQRLAIVAAELEAVRAPSLIAARDGHLAVVSTLGPRWNRSALHQQPMCAHDAIDSLGIKRHQPYRDALVAQYAPNPAIAIAGQIADDPADFLDRGRVVSLPRLTAIAPRRRTRHSCRYVRARHAENFTNQFHWSSSGSEGECAIHFFARPYSTASRRISCSMVFIWTPPACQGLLLCRTDTGCGFISGPCRSKPAGPNGIR
		722466	159	+	722552..722710			hypothetical protein	opposite strand of BCAS0661B			MTSPKSNPFNSFCSTSSLKRSDTNTVARLSFRRNISAPSMRLFRRNILLKTVA
		794473	261	+	794476..794736			hypothetical protein	intergenic gegion			MFPFIPPDPASKGTTSAERICAPLSLHNRARPNSPAEVATKKTVKLPRPHAHHTLGVMHDRSQTTLVSLSDSTGKPKSGFAAPLDER
		Plasmid
		59347	381	-	complement (58875..59255)			hypothetical protein	intergenic gegion, overlaps pBCA055			MHRRSLVYPLIAVATFASAGPIFLVADNDARTLFLQTETVRQDPAGLVAFTMRAVAKHGYRPIGASETVAIALTDYQMDCWRSRVRETGTRYVTDEDHEAGRAPDTTQSWAVIPPGSELDVVRKKVC
